# Supplementary material for: Disparities in Survival Due to Social Determinants of Health and Access to Treatment in US Patients With Operable Malignant Pleural Mesothelioma
Source: PubMed Central journal article supplement (PMC10037156; doi:10.1001/jamanetworkopen.2023.4261), 2023-03-23

## Supplementary Online Content

Alnajar A, Kareff SA, Razi SS, et al. Disparities in survival due to social determinants of health and access to treatment in US patients with operable malignant pleural mesothelioma. *JAMA Netw Open*. 2023;6(3):e234261. doi:10.1001/jamanetworkopen.2023.4261

**eTable 1.** The Description and Characteristics of Excluded Patients

**eTable 2.** Characteristics of MPM Tumors by Treatment Modality (Row-wise Percentages)

**eTable 3.** Characteristics of MPM Tumors by Treatment Modality (Column-wise Percentages)

**eTable 4.** Treatment Specifications and Adjunct Treatments Stratified by the Treatment Modality

**eTable 5.** Univariable Cox (Unadjusted) Model for Factors Correlated with Overall Survival

**eFigure 1.** Kaplan-Meier Survival Curves Comparing Patients Based on Treatment Options and Surgical Types

**eFigure 2.** Kaplan-Meier Survival Curves Comparing Patients Based on Race and Ethnicity

This supplementary material has been provided by the authors to give readers additional information about their work.

**eTable 1:** The Description and Characteristics of Excluded Patients.

| <b>Excluded patients</b>                                 |                           |
|----------------------------------------------------------|---------------------------|
| Age < 18 or > 75                                         | 18,226 (55%) <sup>1</sup> |
| Non-epithelioid histology                                | 20,371 (62%)              |
| Non-biphasic histology                                   | 30,711 (93%)              |
| Unknown Stage                                            | 24,325 (73%)              |
| Clinical Stage IV                                        | 9,751 (29%)               |
| Metastases                                               | 5,332 (16%)               |
| No surgery or chemotherapy                               | 16,758 (51%)              |
| Death prior to surgery                                   | 100 (0.3%)                |
| Unknown Follow up                                        | 2,464 (7.4%)              |
| Surgery not recommended                                  | 1,686 (5.1%)              |
| Tumor extension to mediastinum,<br>rib, or heart tissues | 4,548 (14%)               |

<sup>1</sup>n (%)

**eTable 2:** Characteristics of MPM Tumors by Treatment Modality (Row-wise Percentages).

| Characteristic   | Chemo Only         | Chemo+Surgery      | p-value <sup>b</sup> |
|------------------|--------------------|--------------------|----------------------|
|                  | N=674 <sup>a</sup> | N=715 <sup>a</sup> |                      |
| Clinical Stage I | 348 (56%)          | 272 (44%)          | <0.001               |
| Unknown          | 4                  | 5                  |                      |
| Clinical Stage   |                    |                    | <0.001               |
| Stage I          | 348 (56%)          | 272 (44%)          |                      |
| Stage II         | 187 (44%)          | 236 (56%)          |                      |
| Stage III        | 135 (40%)          | 202 (60%)          |                      |
| Unknown          | 4                  | 5                  |                      |
| Pathologic Stage |                    |                    | <0.001               |
| Stage I          | 24 (23%)           | 82 (77%)           |                      |
| Stage II         | 15 (11%)           | 118 (89%)          |                      |
| Stage III        | 14 (4.3%)          | 310 (96%)          |                      |
| Stage IV         | 7 (14%)            | 42 (86%)           |                      |
| Unknown          | 614                | 163                |                      |

<sup>a</sup>n (%) row-wise<sup>b</sup>Pearson's Chi-squared test

Caption: This table demonstrates various tumor stage categorized by receipt of chemotherapy or chemotherapy with surgery. *P* values are listed in the last column.

**eTable 3:** Characteristics of MPM Tumors by Treatment Modality (Column-wise Percentages).

| Characteristic              | Chemo Only           | Chemo+Surgery        | p-value <sup>b</sup> |
|-----------------------------|----------------------|----------------------|----------------------|
|                             | N = 674 <sup>a</sup> | N = 715 <sup>a</sup> |                      |
| Clinical Stage, n (%)       |                      |                      | <0.001               |
| Stage I                     | 348 (52)             | 272 (38)             |                      |
| Stage II                    | 187 (28)             | 236 (33)             |                      |
| Stage III                   | 135 (20)             | 202 (28)             |                      |
| Unknown                     | 4                    | 5                    |                      |
| Pathologic Stage, n (%)     |                      |                      | <0.001               |
| Stage I                     | 24 (40)              | 82 (15)              |                      |
| Stage II                    | 15 (25)              | 118 (21)             |                      |
| Stage III                   | 14 (23)              | 310 (56)             |                      |
| Stage IV                    | 7 (12)               | 42 (7.6)             |                      |
| Unknown                     | 614                  | 163                  |                      |
| Histological Subtype, n (%) |                      |                      | 0.30                 |
| Biphasic mesothelioma       | 113 (17)             | 135 (19)             |                      |
| Epithelioid mesothelioma    | 561 (83)             | 580 (81)             |                      |

<sup>a</sup>n (%) column-wise<sup>b</sup>Pearson's Chi-squared test

Caption: This table demonstrates various tumor characteristics including histologic subtype, clinical stage, and pathologic stage categorized by receipt of chemotherapy or chemotherapy with surgery. *P* values are listed in the last column.

**eTable 4:** Treatment Specifications and Adjunct Treatments Stratified by the Treatment Modality.

| Characteristic                                              | Chemo Only           | Chemo+Surgery        | p-value <sup>b</sup> |
|-------------------------------------------------------------|----------------------|----------------------|----------------------|
|                                                             | N = 674 <sup>a</sup> | N = 715 <sup>a</sup> |                      |
| Treatment Modality                                          |                      |                      | NA                   |
| Chemo Only                                                  | 638 (95)             | 0 (0)                |                      |
| Chemo and Radiation                                         | 28 (4.2)             | 0 (0)                |                      |
| Chemo and Surgery                                           | 0 (0)                | 527 (74)             |                      |
| Trimodality                                                 | 0 (0)                | 170 (24)             |                      |
| Other                                                       | 8 (1.2)              | 18 (2.5)             |                      |
| Adjunct Treatments, n (%)                                   |                      |                      | 0.071                |
| Experimental                                                | 12 (1.8)             | 22 (3.1)             |                      |
| Immunotherapy                                               | 20 (3.0)             | 14 (2.0)             |                      |
| Other                                                       | 641 (95)             | 673 (94)             |                      |
| Chemotherapy initiation (days from diagnosis), Median (IQR) | 40 (27 – 64)         | 57 (36 – 92)         | <0.001               |
| Unknown                                                     | 35                   | 56                   |                      |
| Surgery Technique, n (%)                                    |                      |                      | NA                   |
| Open/Unspecified                                            | 0 (0)                | 509 (87)             |                      |
| Robotic                                                     | 0 (0)                | 3 (0.5)              |                      |
| VATS                                                        | 0 (0)                | 70 (12)              |                      |
| Unknown                                                     | 0 (0)                | 133                  |                      |

<sup>a</sup>n (%) column-wise; Median (IQR)

<sup>b</sup>Pearson's Chi-squared test; Fisher's exact test; Wilcoxon rank sum test

**eTable 5:** Univariable Cox (Unadjusted) Model for Factors Correlated with Overall Survival.

| <b>Characteristic</b>      | <b>HR (95% CI)<sup>a</sup></b> | <b>p-value</b> |
|----------------------------|--------------------------------|----------------|
| Age                        |                                |                |
| 18-45                      | 1 [Reference]                  |                |
| 45-54                      | 1.43 (0.88-2.32)               | 0.15           |
| 55-64                      | 1.71 (1.10-2.67)               | 0.017          |
| 65+                        | 2.41 (1.56-3.73)               | <0.001         |
| Sex                        |                                |                |
| Female                     | 1 [Reference]                  |                |
| Male                       | 1.65 (1.43-1.90)               | <0.001         |
| Race and/or Ethnicity      |                                |                |
| Non-Hispanic White         | 1 [Reference]                  |                |
| Hispanic                   | 0.83 (0.63-1.10)               | 0.19           |
| Asian                      | 1.35 (0.74-2.44)               | 0.32           |
| Black                      | 1.80 (1.31-2.46)               | <0.001         |
| FPL <sub>≤</sub> 150%      | 1.19 (1.06-1.34)               | 0.003          |
| Rural areas                | 1.16 (0.77-1.73)               | 0.48           |
| Hospital Distance (mi)     |                                |                |
| 0 to 12.49                 | 1 [Reference]                  |                |
| 12.5 to 249                | 0.97 (0.86-1.10)               | 0.67           |
| >250                       | 0.54 (0.39-0.74)               | <0.001         |
| Low Educational Attainment | 1.21 (1.06-1.37)               | 0.004          |
| Insurance Status           |                                |                |

| <b>Characteristic</b>                          | <b>HR (95% CI)<sup>a</sup></b> | <b>p-value</b> |
|------------------------------------------------|--------------------------------|----------------|
| Private Insurance                              | 1 [Reference]                  |                |
| Medicaid/Not Insured                           | 1.21 (0.87-1.69)               | 0.25           |
| Medicare/Other Government                      | 1.44 (1.27-1.63)               | <0.001         |
| <b>Year of Diagnosis</b>                       |                                |                |
| 2004-2008                                      | 1 [Reference]                  |                |
| 2009-2013                                      | 0.78 (0.68-0.91)               | 0.001          |
| 2014-2017                                      | 0.70 (0.59-0.83)               | <0.001         |
| Low Hospital Volume                            | 1.25 (1.11-1.41)               | <0.001         |
| <b>Facility Type</b>                           |                                |                |
| Academic                                       | 1 [Reference]                  |                |
| Non-academic Facilities                        | 1.53 (1.34-1.73)               | <0.001         |
| Integrated                                     | 1.21 (0.99-1.50)               | 0.067          |
| <b>Clinical Stage</b>                          |                                |                |
| Stage I                                        | 1 [Reference]                  |                |
| Stage II                                       | 1.00 (0.88-1.15)               | 0.95           |
| Stage III                                      | 0.94 (0.81-1.09)               | 0.41           |
| <b>Therapy Modality</b>                        |                                |                |
| Chemo Only                                     | 1 [Reference]                  |                |
| Chemo+Surgery                                  | 0.57 (0.51-0.64)               | <0.001         |
| CDCI Score > 0                                 | 1.11 (0.97-1.26)               | 0.12           |
| Chemotherapy initiation (Z score) <sup>b</sup> | 0.89 (0.83-0.95)               | <0.001         |

<sup>a</sup>HR = Hazard Ratio, CI = Confidence Interval

**eFigure 1.** Kaplan-Meier Survival Curves Comparing Patients Based on Treatment Options and Surgical Types: A) between patients underwent chemotherapy with (red) and without (blue) curative surgery; B) between underwent EPP (dark blue) and P/D (dark red) as their curative surgery treatment.

A:

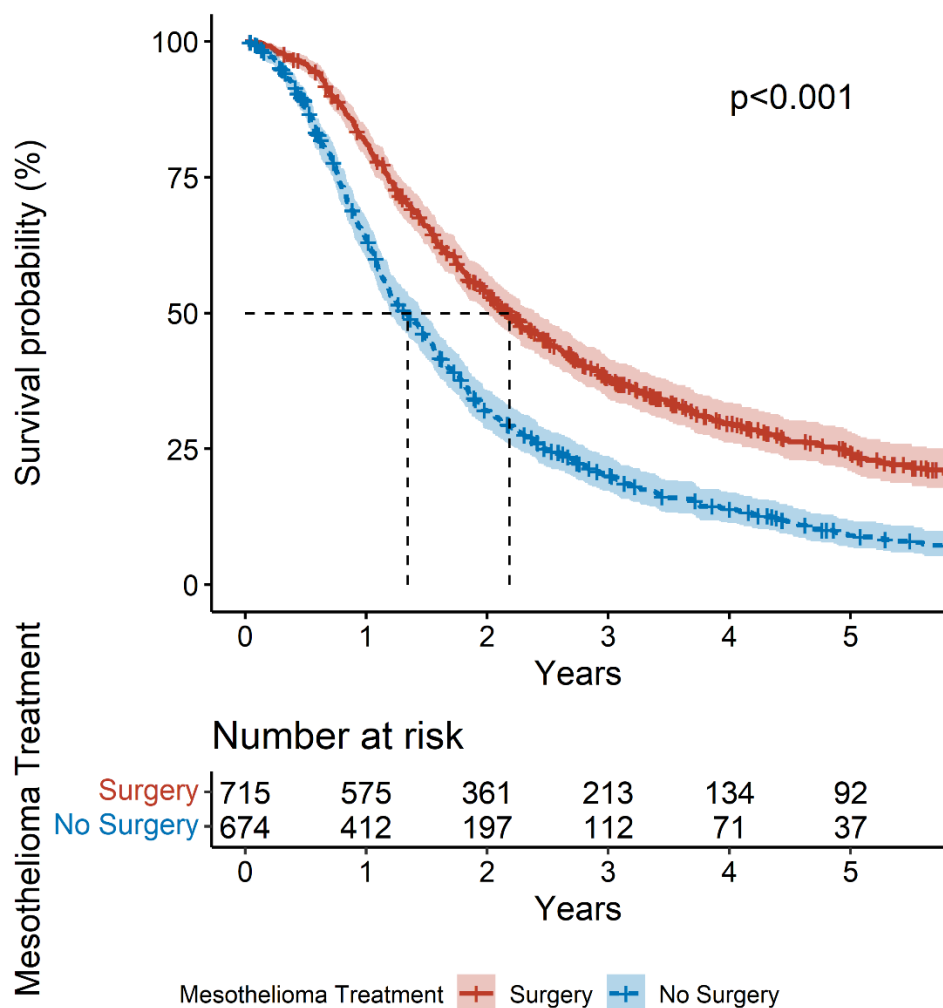

B:

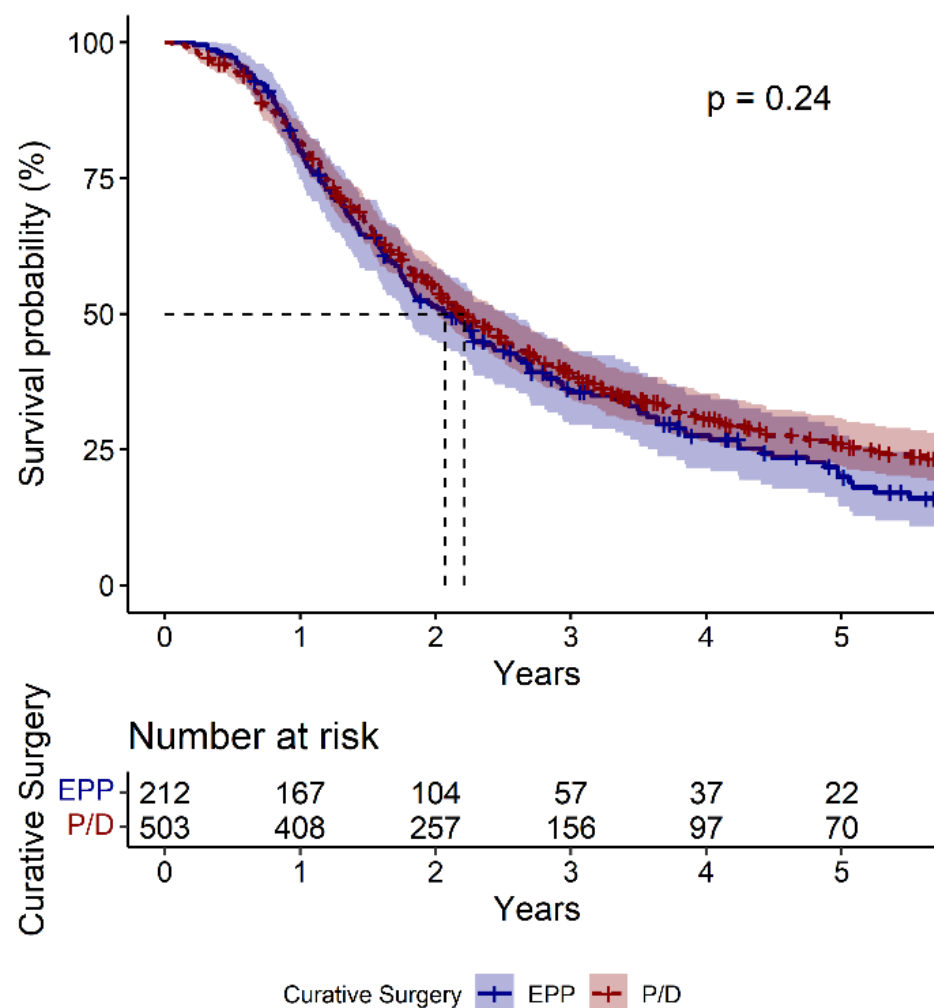



**eFigure 2:** Kaplan-Meier survival curves comparing patients based on race and ethnicity.

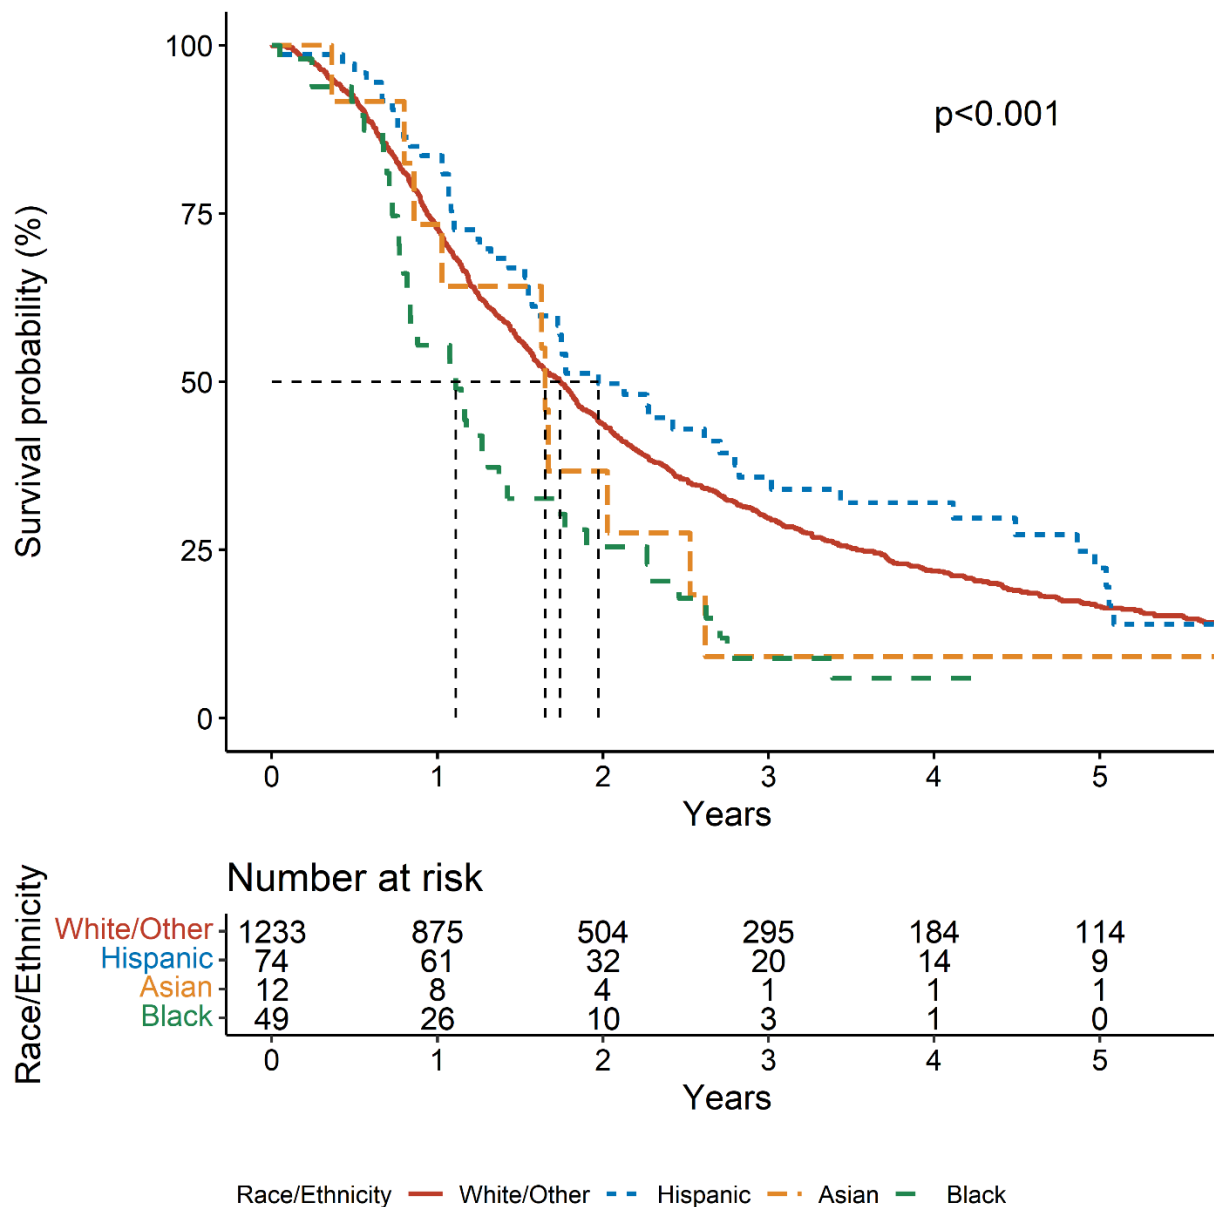

Supplement: jamanetwopen-e234261-s001.pdf [file jamanetwopen-e234261-s001.pdf]
