# Supplementary material for: Disparities in Survival Due to Social Determinants of Health and Access to Treatment in US Patients With Operable Malignant Pleural Mesothelioma
Source: PubMed Central journal article supplement (PMC10037156; doi:10.1001/jamanetworkopen.2023.4261), 2023-03-23
Supplement: jamanetwopen-e234261-s002.pdf [file jamanetwopen-e234261-s002.pdf]

## Data Sharing Statement

Alnajar. Disparities in Survival Due to Social Determinants of Health and Access to Treatment in US Patients With Operable Malignant Pleural Mesothelioma. *JAMA Netw Open*. Published March 23, 2023. doi:10.1001/jamanetworkopen.2023.4261

### Data

**Data available:** No

### Additional Information

**Explanation for why data not available:** NCDB data use agreement don't allow data sharing
